# Supplementary material
Source: publisher figshare collection journal article supplement (https://acs.figshare.com/ndownloader/files/4277444)
Supplement: Supplementary file 1 [file 4277444]

**Supporting Information**

Formation of a Ruthenium(IV)-Oxo Complex  
by Electron-Transfer Oxidation of a  
Coordinatively Saturated Ruthenium(II)  
Complex and Detection of an Oxygen-Rebound  
Intermediates in C-H Bond Oxygenation

**Takahiko Kojima,<sup>\*,†</sup> Kazuya Nakayama,<sup>§</sup> Kenichiro Ikemura,<sup>‡</sup> Takashi Ogura,<sup>‡</sup>  
and Shunichi Fukuzumi<sup>\*,§,Δ</sup>**

*Department of Chemistry, Graduate School of Pure and Applied Sciences, University of Tsukuba, Tennoudai, Tsukuba, Ibaraki 305-8571, Department of Material and Life Science, Graduate School of Engineering, Osaka University, ALCA, Japan Science and Technology Agency (JST), 2-1 Yamada-oka, Suita, Osaka 565-0871, Graduate School of Life Science, University of Hyogo, Kouto, Hyogo 678-1297, Japan, and Department of Bioinspired Science, Ewha Womans University, Seoul, South Korea*

kojima@chem.tsukuba.ac.jp (T. K.) and fukuzumi@chem.eng.osaka-u.ac.jp

<sup>†</sup> University of Tsukuba

<sup>§</sup> Osaka University

<sup>‡</sup> University of Hyogo

<sup>¶</sup> Ewha Womans University

<sup>Δ</sup> ALCA, JST.

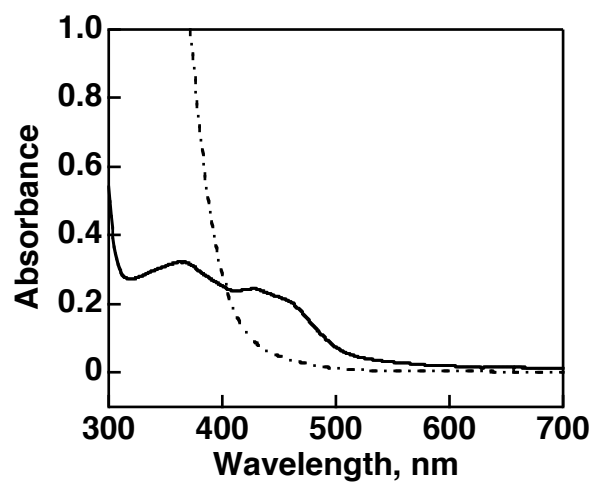

**Figure S1.** UV-vis spectral change upon addition of CAN (10  $\mu\text{mol}$ ) to an aqueous solution of **1** (0.9  $\mu\text{mol}$ ) in 3 mL of  $\text{H}_2\text{O}$  at pH 2.0. The solid line and dotted line are spectra before and after addition of CAN, respectively.

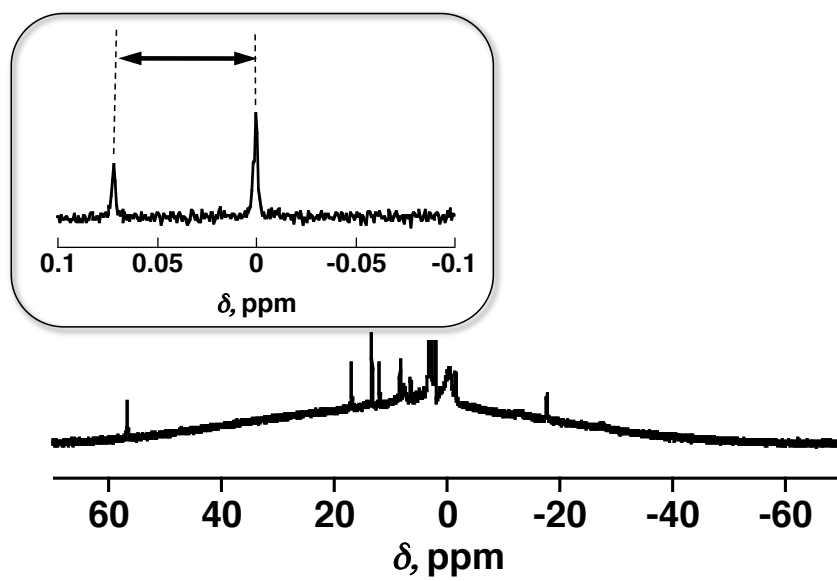

**Figure S2.**  $^1\text{H}$  NMR spectrum of **2** in  $(\text{CD}_3)_2\text{CO}$ . Inset: Signals due to TMS for the Evans' method.

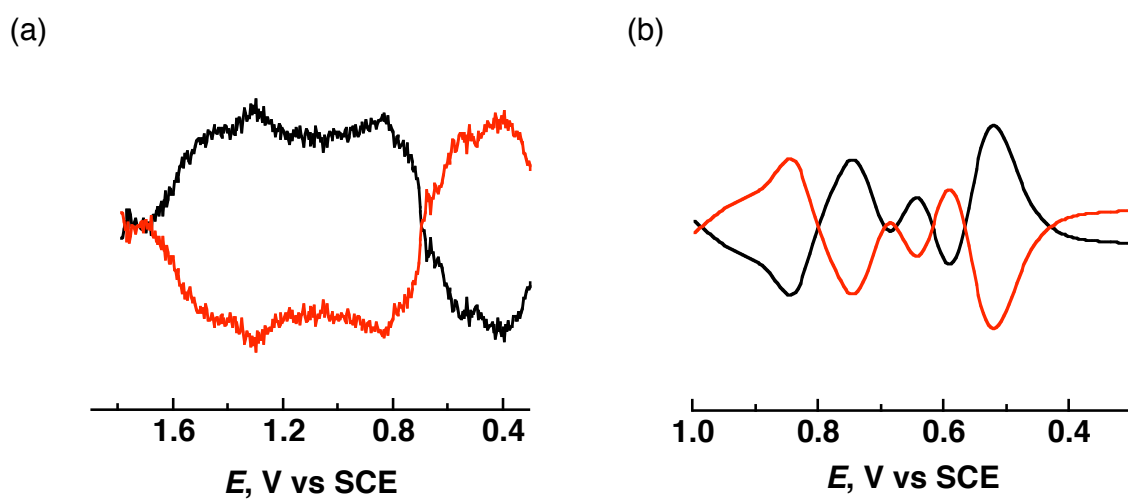

**Figure S3.** Second harmonic ac voltammograms of **2**: (a) in  $\text{CH}_3\text{CN}$  (b) in aqueous  $\text{Na}_2\text{SO}_4$  (0.1 M) at pH 1 (adjusted by portions of  $\text{H}_2\text{SO}_4$ ).

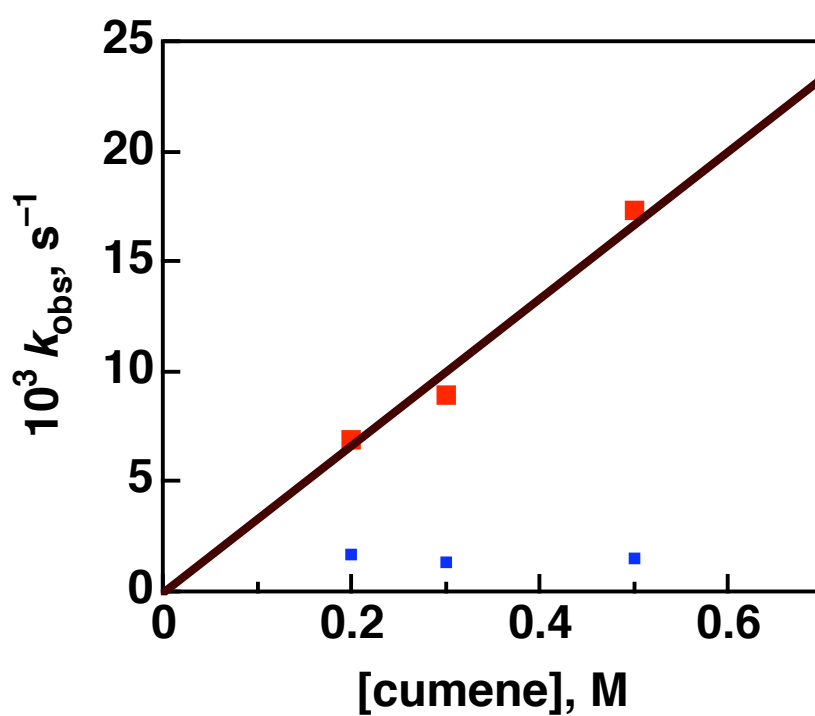

**Figure S4.** Plots of pseudo-first-order rate constants of reaction of **2** with cumene in  $\text{CH}_3\text{CN}$  at 298 K under  $\text{O}_2$  atmosphere vs concentration of cumene: red, the first step; blue, the second step.

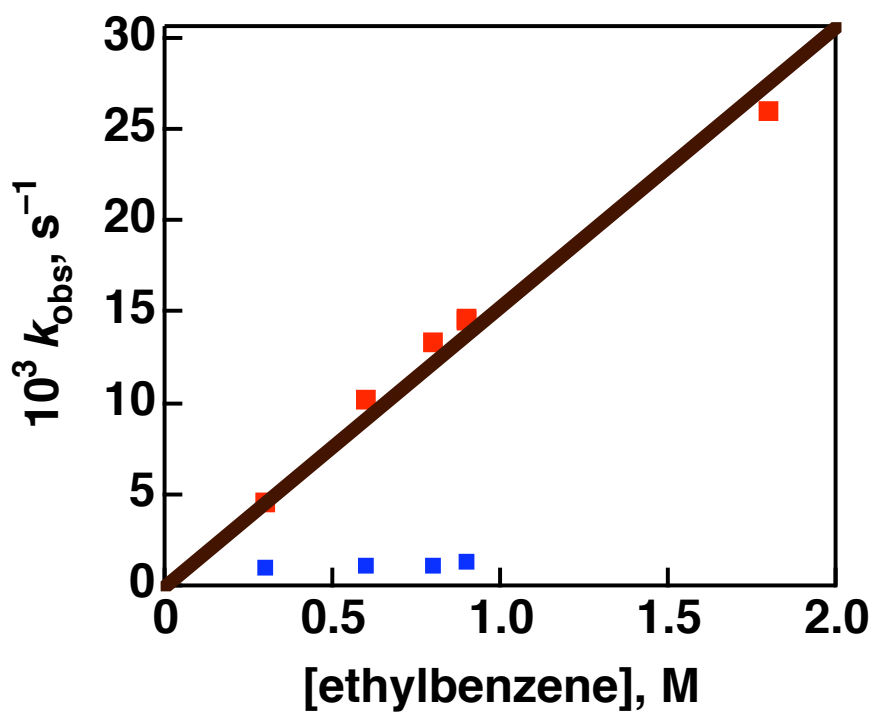

**Figure S5.** Plots of the observed first-order rate constant of the first step (red squares) and the second step (blue squares) in the oxidation of ethylbenzene in  $\text{CH}_3\text{CN}$  at 298 K vs concentration of ethylbenzene.

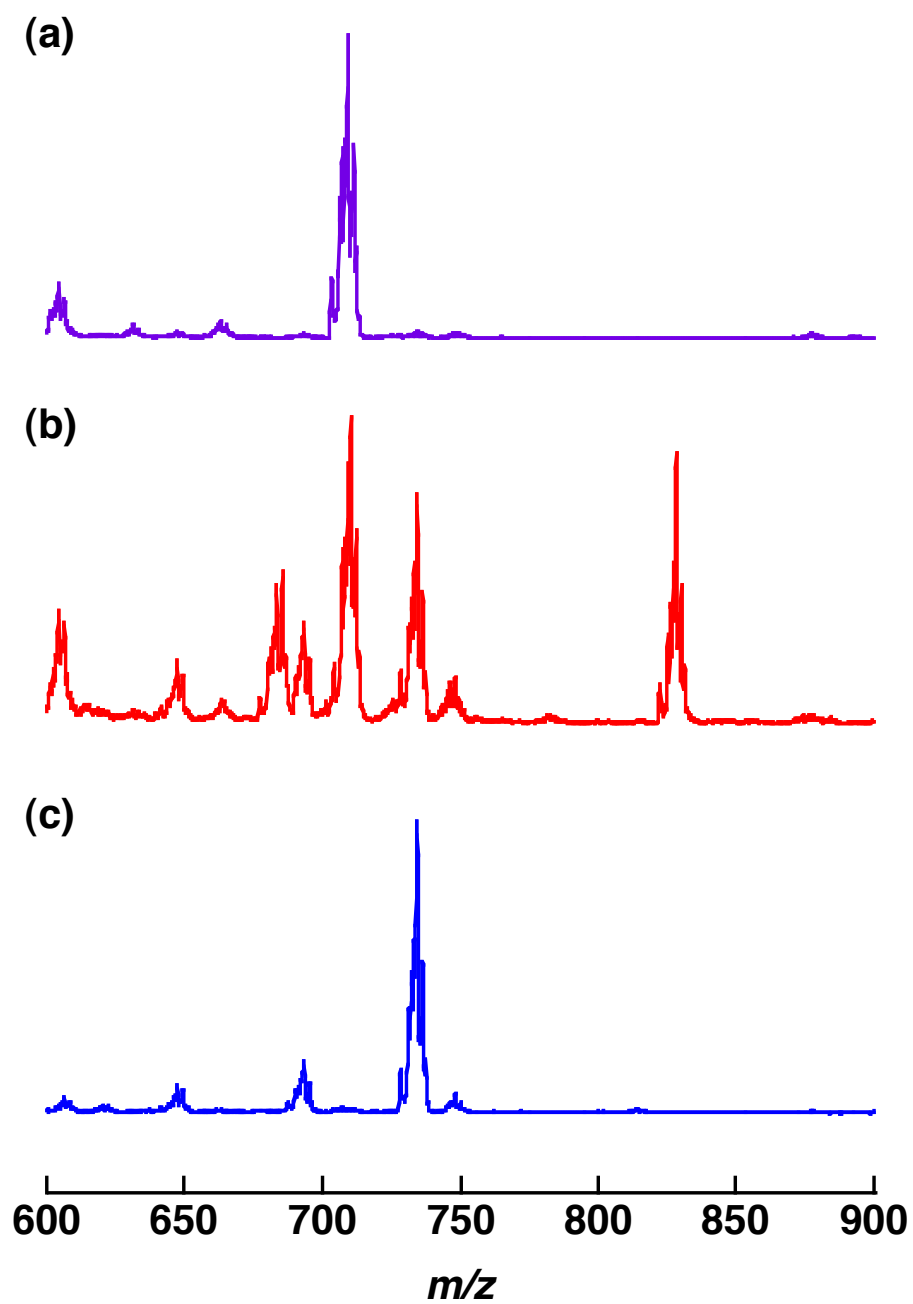

**Figure S6.** Time-course of ESI-MS spectra of the reaction mixture of **2** (0.10 mM) and cumene (200 mM) in CH<sub>3</sub>CN: (a) 0 min, (b) 15 min, (c) 300 min.

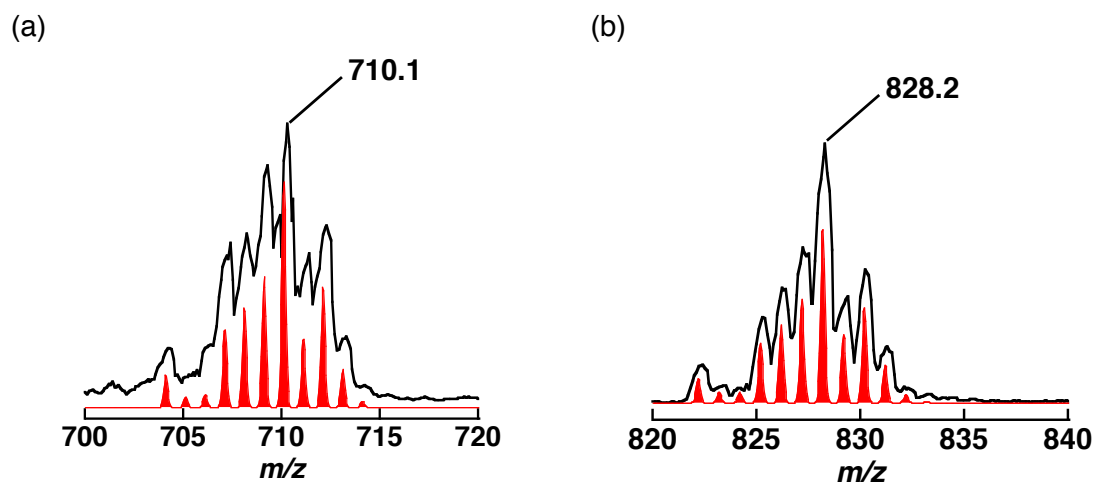

**Figure S7.** Positive-ion ESI-MS spectra of the mixture of cumene (200 mM) and **2** (0.10 mM) (see also Figure 12): (a) A peak cluster at  $m/z = 710.1$  ascribed to  $\{3(^{16}\text{O}) - \text{H}^+ - 2(\text{PF}_6^-)\}^+$ ; (b) a peak cluster at  $m/z = 828.2$  assigned to  $\{4(^{16}\text{O}) - \text{H}^+ - 2(\text{PF}_6^-)\}^+$ .



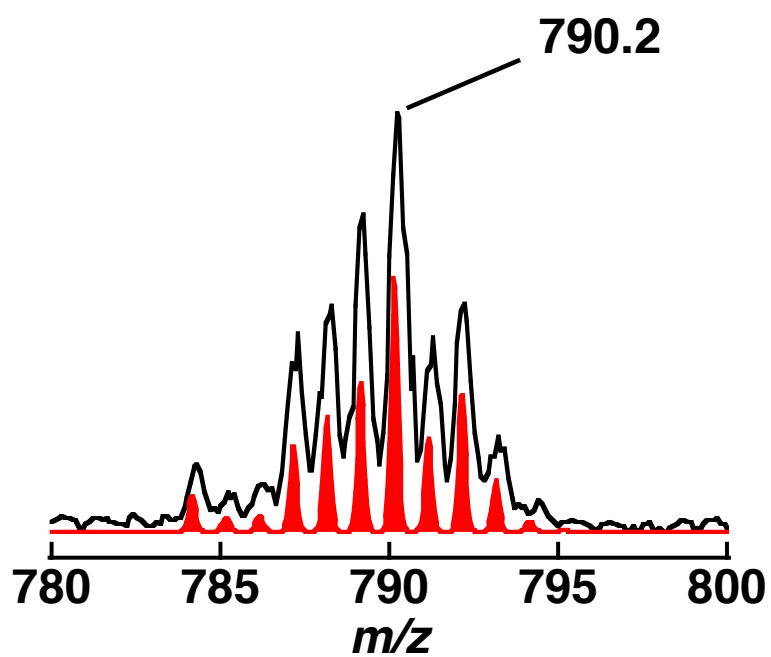

**Figure S8.** Positive-ion ESI-MS spectrum of the mixture of cyclohexene (120 mM) and **2** (0.10 mM) in  $\text{CH}_3\text{CN}$ : A peak cluster at  $m/z = 790.2$  assigned to  $\{[\text{Ru}^{\text{III}}(\text{OC}_6\text{H}_9)(\text{TPA})(\text{bpy})](\text{PF}_6^-)\}^+$ .

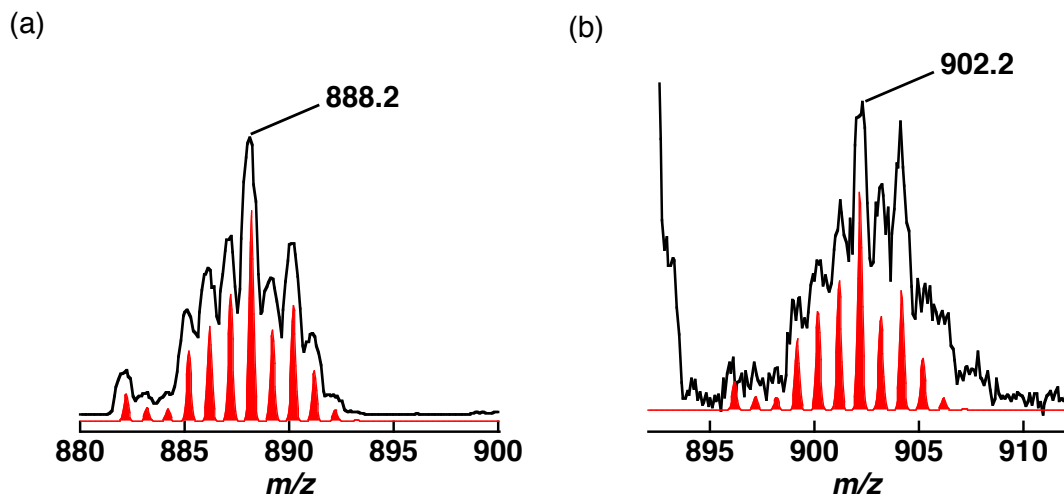

**Figure S9.** Positive-ion ESI-MS spectra of the mixture of DHA (50 mM) and **2** (5.0 mM) in  $\text{CD}_3\text{CN}$ : (a) A peak cluster at  $m/z$  888.2 assigned to  $\{[\text{Ru}^{\text{III}}(\text{OC}_{14}\text{H}_{11})(\text{TPA})(\text{bpy})](\text{PF}_6^-)\}^+$ ; (b) a peak cluster at  $m/z$  902.2 ascribed to  $\{[\text{Ru}^{\text{III}}(\text{OC}_{14}\text{H}_9\text{O})(\text{TPA})(\text{bpy})](\text{PF}_6^-)\}^+$ .

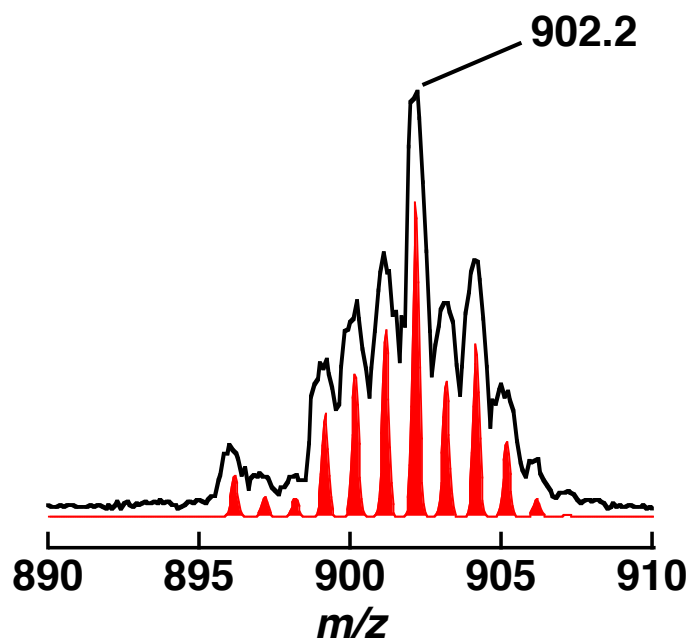

**Figure S10.** Positive-ion ESI-MS spectrum of the mixture of anthrone (50 mM) and **2** (5.0 mM) in  $\text{CD}_3\text{CN}$ : A peak cluster at  $m/z = 902.2$  assigned to  $\{[\text{Ru}^{\text{III}}(\text{OC}_{14}\text{H}_9\text{O})(\text{TPA})(\text{bpy})](\text{PF}_6^-)\}^+$ .

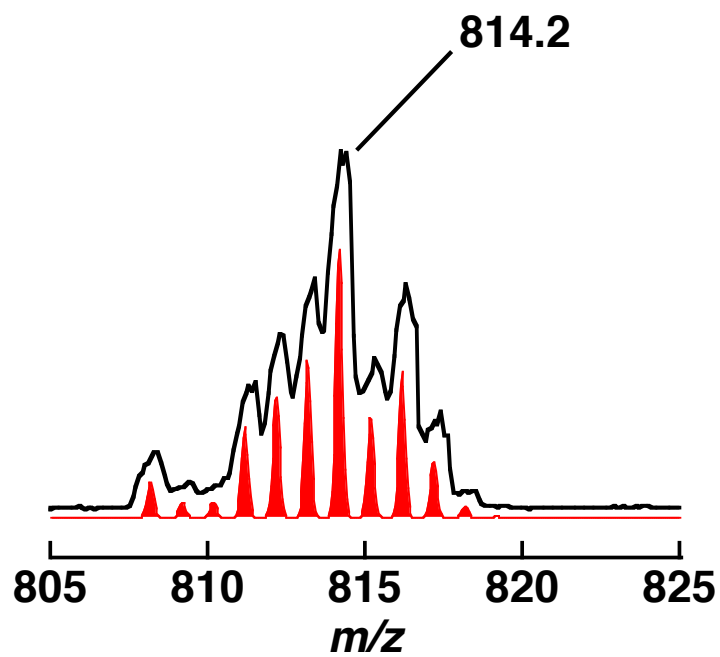

**Figure S11.** Positive-ion ESI-MS spectrum of the mixture of ethylbenzene (100 mM) and **2** (5.0 mM) in  $\text{CD}_3\text{CN}$ : A peak cluster at  $m/z = 814.2$  assigned to  $\{[\text{Ru}^{\text{III}}(\text{OCCH}(\text{CH}_3)(\text{C}_6\text{H}_5))(\text{TPA})(\text{bpy})](\text{PF}_6^-)\}^+$ .

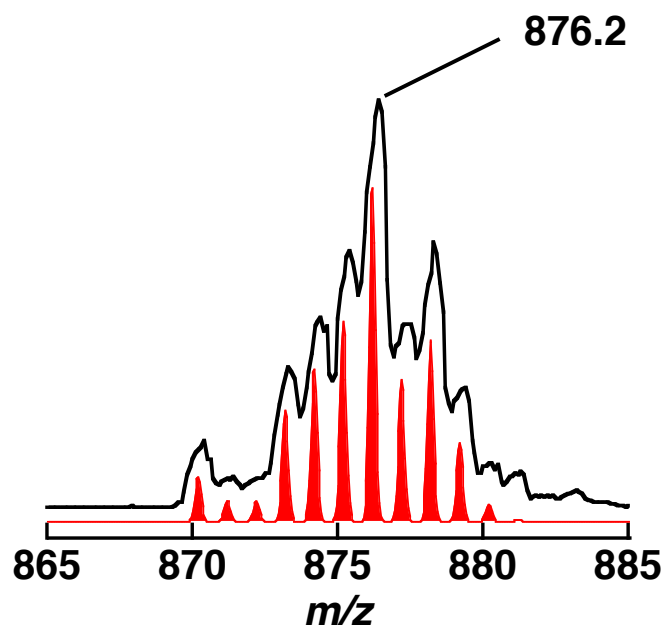

**Figure S12.** Positive-ion ESI-MS spectrum of the mixture of diphenylmethane (15 mM) and **2** (5.0 mM) in  $\text{CD}_3\text{CN}$ : A peak cluster at  $m/z = 876.2$  ascribed to  $\{[\text{Ru}^{\text{III}}(\text{OCCH}(\text{C}_6\text{H}_5)_2)(\text{TPA})(\text{bpy})](\text{PF}_6^-)\}^+$ .

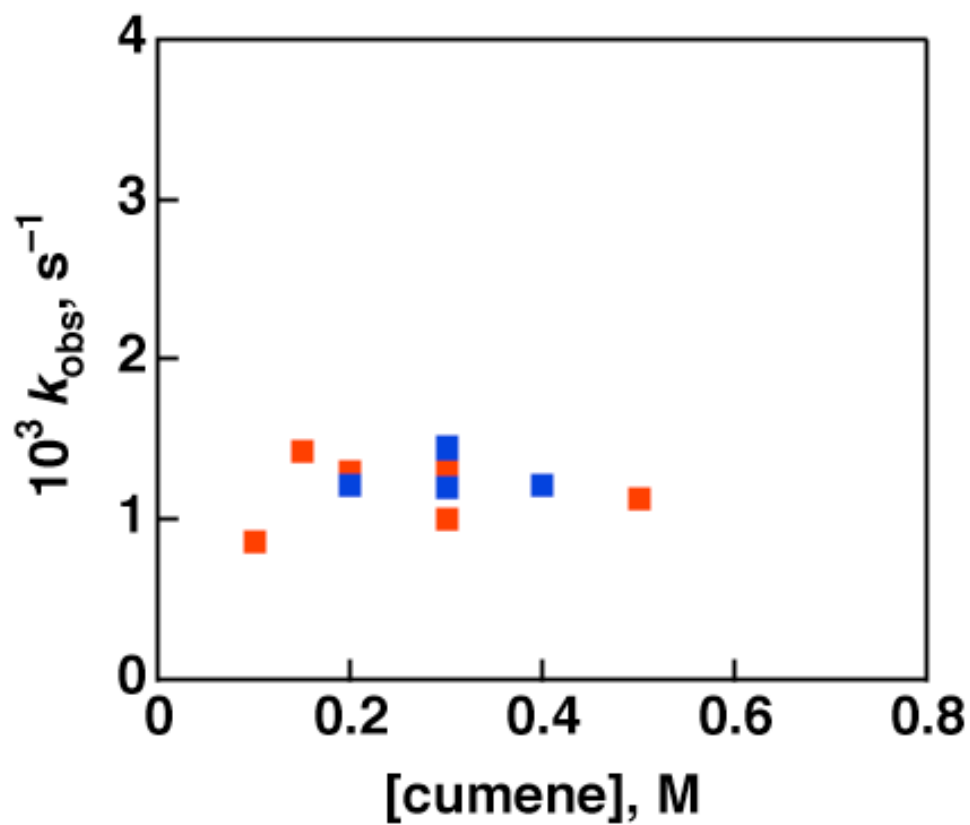

**Figure S13.** Concentration dependence of first-order rate constants for the second step in the cumene oxygenation by **2** in  $\text{CH}_3\text{CN}$  at 298 K (red, in the absence of  $\text{D}_2\text{O}$ ; blue, in the presence of excess amount of  $\text{D}_2\text{O}$  (2M)).
